# Supplementary material
Source: Elsevier journal article supplement (https://www.sciencedirect.com/science/article/pii/S2387020619303006)
Supplement: mmc1 [file S2387020619303006:mmc1.docx]

**Problemas de salud crónicos:**

| **Problemas de salud crónicos considerados en Calderón-Larrañaga et al.1** | **Problemas de salud crónicos equivalentes en Encuesta Nacional de Salud de España (ENSE)** |
| --- | --- |
| Hypertension | Tensión alta |
| Dyslipidemia | Colesterol alto |
| Chronic kidney diseases | Problemas de riñón |
| Ischemic heart disease | Cardiopatía isquémica (infarto o angina de pecho, enfermedad coronaria) |
| Anemia | - |
| Osteoarthritis and other degenerative joint diseases | Artrosis |
| Colitis and related diseases | - |
| Deafness, hearing impairment | Dificultad para oír en un sitio tranquilo: Sí mucha dificultad o No puedo hacerlo en absoluto |
| Heart failure | Otras enfermedades del corazón |
| Obesity | IMC del adulto: obesidad |
| Thyroid diseases | Problemas de tiroides |
| Dementia |  |
| Atrial fibrillation | - |
| Depression and mood diseases | Depresión |
| Solid neoplasms | Tumores malignos |
| Diabetes | Diabetes |
| Cerebrovascular disease | Ictus |
| Osteoporosis | Osteoporosis |
| Other musculoskeletal and joint diseases | - |
| Dorsopathies | - |
| Glaucoma | - |
| Cataract and other lens diseases | Cataratas |
| Asthma | Asma |
| Other eye diseases | - |
| COPD, emphysema, chronic bronchitis | Bronquitis crónica, enfisema, EPOC |
| Autoimmune diseases | - |
| Blindness, visual impairment | Dificultad para ver: Sí, mucha dificultad o No puedo ver en absoluto |
| Esophagus, stomach, and duodenum diseases | Úlcera de estómago o duodeno |
| Prostate diseases | Problemas de próstata |
| Inflammatory arthropathies | - |
| Other cardiovascular diseases | - |
| Neurotic, stress-related and somatoform diseases | Ansiedad crónica |
| Other genitourinary diseases | Incontinencia urinaria o problemas de control de la orina |
| Cardiac valve diseases | - |
| Migraine and facial pain syndromes | Migraña o dolor de cabeza frecuente |
| Other psychiatric and behavioral diseases | Otros problemas mentales |
| Other neurological diseases | - |
| Sleep disorders | - |
| Bradycardias and conduction diseases | - |
| Peripheral vascular disease | - |
| Other metabolic diseases | - |
| Peripheral neuropathy | - |
| Chronic pancreas, biliary tract and gallbladder diseases | - |
| Allergy | Alergia crónica |
| Parkinson and parkinsonism | - |
| Other respiratory diseases | - |
| Chronic ulcer of the skin | - |
| Epilepsy | - |
| Ear, nose, throat diseases | - |
| Inflammatory bowel diseases | - |
| Hematological neoplasms | - |
| Venous and lymphatic diseases | Varices |
| Schizophrenia and delusional diseases | - |
| Blood and blood forming organ diseases | - |
| Other digestive diseases | - |
| Chronic infectious diseases | - |
| Chronic liver diseases | Cirrosis, disfunción hepática |
| Multiple sclerosis | - |
| Other skin diseases | Problemas crónicos de piel |
| Chromosomal abnormalities | - |

**Actividades básicas de la vida diaria (Índice de Katz2)**

| **Valoración de las actividades básicas de la vida diaria según el Índice de Katz** | | **Pregunta equivalente en ENSE** | **Respuesta equivalentes en ENSE** |
| --- | --- | --- | --- |
| BAÑO | Independiente (1):  Se baña enteramente solo o necesita ayuda sólo para lavar una zona (como la espalda o una extremidad con minusvalía). | Dificultad para actividades básicas diarias: Ducharse o bañarse sin ayuda | No, ninguna dificultad Sí, alguna dificultad |
| Dependiente (0):  Necesita ayuda para lavar más de una zona del cuerpo, ayuda para salir o entrar en la bañera o no se baña solo. | Sí, mucha dificultad  No puedo hacerlo por mí mismo |
| VESTIDO | Independiente(1):  Coge la ropa de cajones y armarios, se la pone y puede abrocharse. Se excluye el acto de atarse los zapatos. | Dificultad para actividades básicas diarias: Vestirse y desvestirse sin ayuda | No, ninguna dificultad Sí, alguna dificultad |
| Dependiente (0):  No se viste por sí mismo o permanece parcialmente desvestido. | Sí, mucha dificultad  No puedo hacerlo por mí mismo |
| USO DEL WC | Independiente (1):  Va al W.C. solo, se arregla la ropa y se asea los órganos excretores. | Dificultad para actividades básicas diarias: Ir al servicio sin ayuda | No, ninguna dificultad Sí, alguna dificultad |
| Dependiente (0):  Precisa ayuda para ir al W.C. | Sí, mucha dificultad  No puedo hacerlo por mí mismo |
| MOVILIDAD | Independiente (1):  Se levanta y acuesta en la cama por sí mismo y puede sentarse y levantarse de una silla por sí mismo. | Dificultad para actividades básicas diarias: Sentarse, levantarse de una silla o de una cama, acostarse sin ayuda | No, ninguna dificultad Sí, alguna dificultad |
| Dependiente (0):  Necesita ayuda para levantarse y acostarse en la cama y/o silla, no realiza uno o más desplazamientos. | Sí, mucha dificultad  No puedo hacerlo por mí mismo |
| CONTINENCIA | Independiente (1):  Control completo de micción y defecación | Ha padecido en los últimos 12 meses: Incontinencia urinaria o problemas de control de la orina | No/missing |
| Dependiente (0):  Incontinencia parcial o total de la micción o defecación. | Sí |
| ALIMENTACIÓN | Independiente (1):  Lleva el alimento a la boca desde el plato o equivalente. Se excluye cortar la carne. | Dificultad para actividades básicas diarias: Alimentarse sin ayuda | No, ninguna dificultad Sí, alguna dificultad |
| Dependiente (0):  Necesita ayuda para comer, no come en absoluto o requiere alimentación parenteral. | Sí, mucha dificultad  No puedo hacerlo por mí mismo |

[1] Calderon-Larranaga A, Vetrano DL, Onder G, et al. Assessing and Measuring Chronic Multimorbidity in the Older Population: A Proposal for Its Operationalization. The journals of gerontology Series A, Biological sciences and medical sciences 2017; 72: 1417-23.

[2] Katz S, Ford AB, Moskowitz RW, Jackson BA, Jaffe MW. Studies of Illness in the Aged. The Index of Adl: A Standardized Measure of Biological and Psychosocial Function. Jama 1963; 185: 914-9.
